# Supplementary material for: Development of Sterile Insect Technique for Control of the European Grapevine Moth, Lobesia botrana, in Urban Areas of Chile
Source: MDPI journal article supplement (doi:10.3390/insects12050378), 2021-04-22
Supplement: s1 [file s1]

# Development of the sterile insect technique for the control of the European grapevine moth, *Lobesia botrana*, in urban areas of Chile next to grape and fruit production areas

Gregory. S. Simmons <sup>1,\*</sup>, Melissa Cristal Salazar Sepulveda <sup>2,\*</sup>, Edith Alejandra Fuentes Barrios <sup>2,\*</sup>, Marcela Idalsoaga Villegas <sup>2</sup>, Raul Enrique Medina Jimenez <sup>2</sup>, Alvaro Rodrigo Garrido Jerez <sup>2,\*</sup>, Ruth Henderson <sup>1</sup> and Hernán Donoso Riffo <sup>2,3</sup>

<sup>1</sup> United States Department of Agriculture, Animal Plant Health Inspection Service, Plant Protection and Quarantine, Science and Technology, Salinas, CA, USA; Ruth.Henderson@usda.gov

<sup>2</sup> Servicio Agrícola y Ganadero, Santiago and Arica, Chile; marcela.idalsoaga@sag.gob.cl; raul.medina@sag.gob.cl

<sup>3</sup> Deceased

\* Correspondence: Gregory.S.Simmons@usda.gov; Melissa.Salazar@sag.gob.cl; Edith.Fuentes@sag.gob.cl; Alvaro.Garrido@sag.gob.cl

## Supplementary Material

### Confirmatory Irradiation Studies

#### Methods

The experimental design for the evaluation of sterility for 150 Gy treatment for the parental ( $P_1$ ) crosses was 3 replicate experiments, with 3 to 5 replicate crosses set up within each experiment for all the treated (T) by untreated (U) cross combinations along with a control treatment of  $U \text{♀} \times U \text{♂}$  crosses. For experiment 1, crosses were made with 10 mating pairs, in experiments 2 and 3, 20 mating pairs were used. Adult moths were collected from pupal emergence cages and placed into the 0.125 L plastic oviposition cages and supplied with sugar water on cotton wicks. These cages were maintained for 5 days at  $22 \pm 1^\circ \text{C}$ ,  $65 \pm 5\%$  RH and 16:8 h LD. After each 24 h period, moths were moved to a new cage for a total of 5 separate collections of eggs. Egg strips were removed after 10 d to count the number of eclosed and unclosed eggs.

To determine the level of  $F_1$  sterility of irradiated males produced from the  $U \text{♀} \times T \text{♂}$  cross, surviving eggs were infested on diet using the previously described larval rearing methods to rear to adult  $F_1$  moths. Male and female  $F_1$  adults obtained from these  $P_1$  crosses were crossed with fertile adults from the opposite sex. Moths from the parental  $U \text{♀} \times U \text{♂}$  cross were also reared to  $F_1$  adults to use for a control cross for the  $F_1$  sterility testing. Depending on the number of  $F_1$  adults that were obtained, up to 5 replicate crosses for each sex were set up with as many as 20 mating pairs per cage. There were some replicates where far less material was available for 20 mating pairs per cage, data was collected only from crosses with at least 3 mating pairs. Eggs were collected and counted as described above.

The percentage sterility levels were determined by dividing the number of eclosed eggs by the total number of eggs  $\times 100$  and calculated for each day's egg collection for each cage. An index of sterility assessment was calculated using the method of Topozada et al. 1966 for each category of cross. For analysis, the percentage of eggs eclosed were arcsine-square root transformed and the differences in the

number of eggs per female and percent egg hatch between each cross type were analyzed with one-way ANOVA, followed by a Tukey's HSD mean separation test where appropriate using the statistical software package JMP®, Version 13.1.0. (SAS Institute Inc., Cary, NC, 1989-2019).

Sterility data were also evaluated for 160 Gy treatment by setting up 4 replicate experiments with 4 replicate crosses for each experiment for all the irradiated cross combinations along with the control treatment of  $U_{\text{♀}} \times U_{\text{♂}}$  crosses. Crosses were made with 10 mating pairs. Assays for sterility, calculations of the sterility index, and statistical analysis were performed as above.  $F_1$  sterility was not assessed for these crosses.

## Results

At 150 Gy there were no significant differences in the mean number of eggs produced per female for any of the irradiated cross treatments or the control ( $F_{3,48} = 0.9041$ ,  $p = 0.4461$ ) (Table S1). There were significant differences in the percentage of egg hatch between the different cross types ( $F_{3,48} = 264.4$ ,  $p < 0.001$ ). The  $T_{\text{♀}} \times T_{\text{♂}}$  and  $T_{\text{♀}} \times U_{\text{♂}}$  crosses had the lowest percentage of egg hatch with means of 1.7% and 4.1% respectively compared to 53.1% for the  $U_{\text{♀}} \times T_{\text{♂}}$  cross and 82.3% for the untreated control (Table S1).

For the  $F_1$  crosses, there were significant differences for the mean number of eggs produced per female ( $F_{2,99} = 22.7$ ,  $p < 0.001$ ) and for the mean percentage of egg hatch ( $F_{2,99} = 212.6$ ,  $p < 0.001$ ) with 14.6%, 24.0%, and 83.9% for the  $U_{\text{♀}} \times F_{1\text{♂}}$ ,  $F_{1\text{♀}} \times U_{\text{♂}}$  and control cross respectively (Table S1).

The results for 160 Gy crosses, were similar in value to 150 Gy crosses for both the mean number of eggs per females which were not significantly different ( $F_{3,60} = 1.2$ ,  $p = 0.326$ ) and the mean percentage egg hatch which were significant ( $F_{3,60} = 939$ ,  $p < 0.0001$ ) (Table S2).

**Table S1.** Adult EGVM mean (SD) % egg hatch and % sterility index (IE) for  $P_1$  crosses of treated (T) and untreated (U) moths and  $F_1$  by U crosses after 150 Gy treatment.  $F_1$  cross data shown are from the progeny of the parental cross between irradiated males and female moths ( $U_{\text{♀}} \times T_{\text{♂}}$ ). Numbers followed by different letters were significantly different by Tukey's HSD analysis.

| Treatment                           | No. of Replicate Experiments | No. Mating Pairs per Experiment | Total No. Mating Pairs ( $\text{♀} \times \text{♂}$ )* | No. Replicate Crosses per Experiment* | Mean (SD) No. Eggs per female | Mean (SD) % Egg Hatch | IE (%) |
|-------------------------------------|------------------------------|---------------------------------|--------------------------------------------------------|---------------------------------------|-------------------------------|-----------------------|--------|
| $T_{\text{♀}} \times U_{\text{♂}}$  | 3                            | 20                              | 230                                                    | 5                                     | 80.2 (13.8) <b>a</b>          | 4.1 (2.4) <b>c</b>    | 95.1   |
| $U_{\text{♀}} \times T_{\text{♂}}$  | 3                            | 20                              | 230                                                    | 5                                     | 78.5 (13.6) <b>a</b>          | 53.1 (14.5) <b>b</b>  | 37.3   |
| $T_{\text{♀}} \times T_{\text{♂}}$  | 3                            | 20                              | 230                                                    | 5                                     | 76.4 (9.0) <b>a</b>           | 1.7 (1.5) <b>c</b>    | 98.1   |
| $U_{\text{♀}} \times U_{\text{♂}}$  | 3                            | 20                              | 230                                                    | 5                                     | 84.1 (12.1) <b>a</b>          | 82.3 (10.5) <b>a</b>  | NA     |
| <b><math>F_1</math> Crosses</b>     |                              |                                 |                                                        |                                       |                               |                       |        |
| $F_{1\text{♀}} \times U_{\text{♂}}$ | 3                            | 2-20                            | 421                                                    | 12-20                                 | 90.1 (27.2) <b>a</b>          | 23.9 (11.5) <b>b</b>  | 67.75  |
| $U_{\text{♀}} \times F_{1\text{♂}}$ | 3                            | 5-20                            | 646                                                    | 12-20                                 | 58.3 (15.7) <b>b</b>          | 14.9 (11.3) <b>c</b>  | 80.16  |
| $U_{\text{♀}} \times U_{\text{♂}}$  | 3                            | 4-20                            | 367                                                    | 6-8                                   | 90.2 (28.4) <b>a</b>          | 83.9 (10.5) <b>a</b>  | NA     |

\*Experiment 1 had 10 mating pairs per cage and only 3 replicates.

**Table S2.** Adult EGVM mean (SD) % egg hatch and % sterility index (IE) for P<sub>1</sub> crosses after 160 Gy treatment. Numbers followed by different letters were significantly different by Tukey's HSD analysis.

| Treatment | No. of Replicate Experiments | No. Mating Pairs per Experiment | Total No. Mating Pairs (♀ x ♂) | No. Replicate Crosses per Experiment* | Mean (SD) No. Eggs per female | Mean Egg Hatch (SD) (%) | IE (%) |
|-----------|------------------------------|---------------------------------|--------------------------------|---------------------------------------|-------------------------------|-------------------------|--------|
| T ♀ x U ♂ | 4                            | 10                              | 160                            | 4                                     | 82.9 (13.9) <b>a</b>          | 3.4 (1.9) <b>c</b>      | 96.2   |
| U ♀ x T ♂ | 4                            | 10                              | 160                            | 4                                     | 84.9 (13.8) <b>a</b>          | 65.1 (8.7) <b>b</b>     | 25.5   |
| T ♀ x T ♂ | 4                            | 10                              | 160                            | 4                                     | 75.0 (18.3) <b>a</b>          | 1.3 (1.1) <b>d</b>      | 98.7   |
| U ♀ x U ♂ | 4                            | 10                              | 160                            | 4                                     | 82.7 (17.6) <b>a</b>          | 89.7 (4.8) <b>a</b>     | NA     |

### Spatial Analysis of Wild EGVM Trap Captures in Release and Control Plots

To help analyze the distribution of the wild EGVM population in the city of Requinoa and a possible source for the migration of moths into the release plot, the mean wild moth catch per trap per week was calculated by location for all the traps in the release and control plots. These were plotted on a map of the city showing trap catch in each location using a relative heat map scale (Figure S1). We evaluated the hypothesis of an equal distribution of moths within each plot for the release and control plots plot by one-way ANOVA after the Box-Cox transformation to normalize a data set with many 0s. The mean (SD) number of wild EGVM caught per trap per week ranged from 0.9 (1.7) to 35.7 (42.2) in the release plot and from 1.4 (2.3) to 132.5 (62.7) in the control plot and differed significantly among traps within plots ( $F_{33,1107} = 4.95, p < 0.001$ ) and ( $F_{27,883} = 3.94, p < 0.001$ ) respectively. The statistical software package JMP®, Version 13.1.0. was used for this analysis (SAS Institute Inc., Cary, NC, 1989-2019).
